# Supplementary material for: Improving model representation of rapid ozone deposition over soil in the central Tibetan Plateau
Source: Royal Society of Chemistry journal article supplement (doi:10.1039/d3ea00153a), 2024-01-01
Supplement: d3ea00153a1.pdf [file d3ea00153a1.pdf]

*Environmental Science: Atmospheres*

Supporting Information for

**Improving Model Representation of Rapid Ozone Deposition over Soil in the  
Central Tibetan Plateau**

Chong Zhang<sup>a</sup>, Jianshu Wang<sup>a</sup>, Yingjie Zhang<sup>†a</sup>, Wanyun Xu<sup>b</sup>, Gen Zhang<sup>b</sup>, Guofang Miao<sup>c</sup>,  
Jiacheng Zhou<sup>d</sup>, Hui Yu<sup>d</sup>, Weixiong Zhao<sup>d</sup>, Weili Lin<sup>e</sup>, Ling Kang<sup>a</sup>, Xuhui Cai<sup>a</sup>, Hongsheng  
Zhang<sup>f</sup>, Chunxiang Ye<sup>\*a</sup>

<sup>a</sup> SKL-ESPC & SEPKL-AERM, College of Environmental Sciences and Engineering, and Center for Environment  
and Science, Peking University, Beijing, China.

<sup>b</sup> State Key Laboratory of Severe Weather & Key Laboratory for Atmospheric Chemistry of CMA, Institute of  
Atmospheric Composition, Chinese Academy of Meteorological Sciences, Beijing, China.

<sup>c</sup> School of Geographical Sciences, Fujian Normal University, Fuzhou, China.

<sup>d</sup> Laboratory of Atmospheric Physico-Chemistry, Anhui Institute of Optics and Fine Mechanisms, Chinese  
Academy of Science, Hefei, Anhui, China.

<sup>e</sup> College of Life and Environmental Sciences, Minzu University of China, Beijing, China

<sup>f</sup> Department of Atmospheric and Oceanic Sciences, School of Physics, Peking University, Beijing, China

<sup>†</sup> Now at: School of Ecology and Nature Conservation, Beijing Forestry University, Beijing, China.

**Contents of this file**

Figures S1 to S4

**Introduction**

The supporting information includes four supplementary figures.

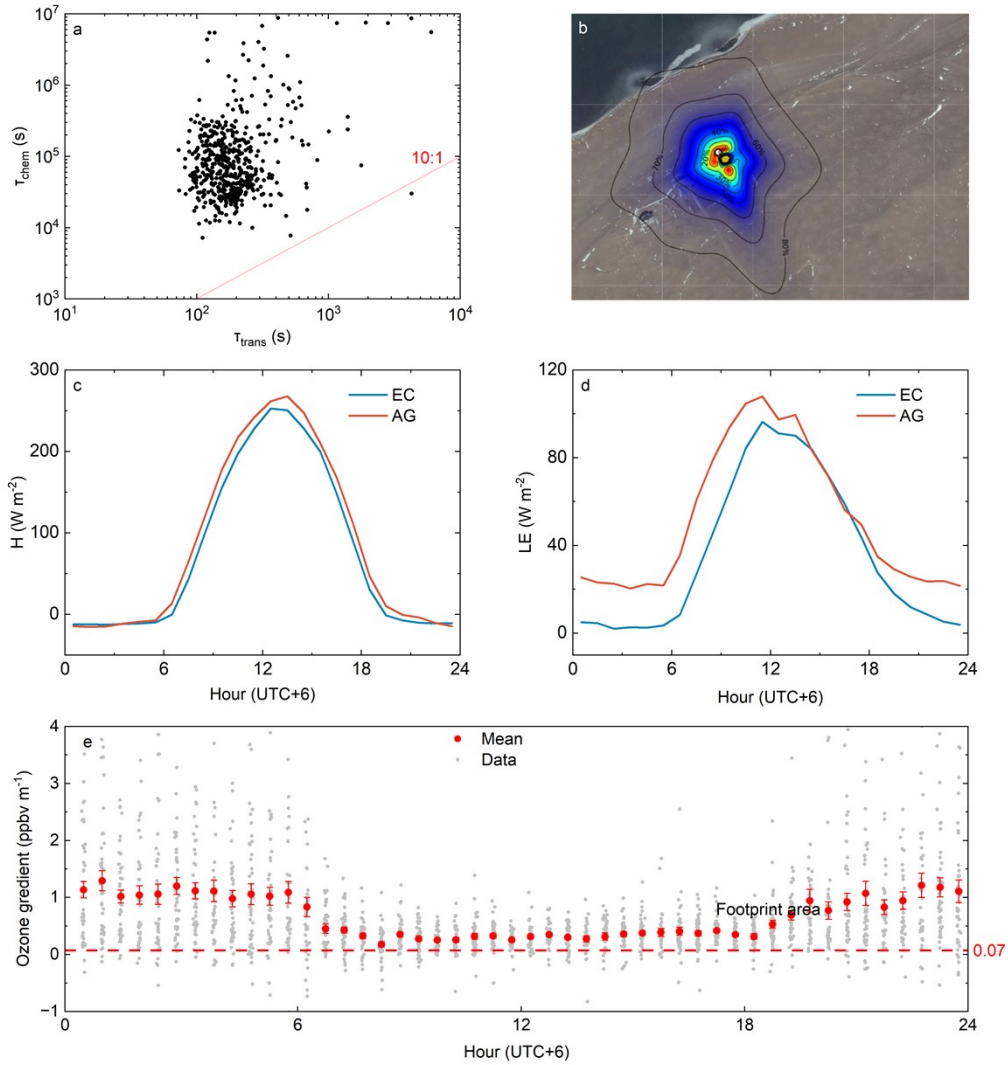

**Figure S1.** Tests of quality control. (a) Comparison of the turbulence transport time of ozone ( $\tau_{trans}$ ) and the chemical reaction time ( $\tau_{chem}$ ) of ozone with NO. (b) Footprint area in entire observation period. Comparison of (c) sensible heat flux ( $H$ ), (d) latent heat flux ( $LE$ ) between observation of the eddy covariance method and the aerodynamic gradient method. (e) Diel profile of ozone gradient.

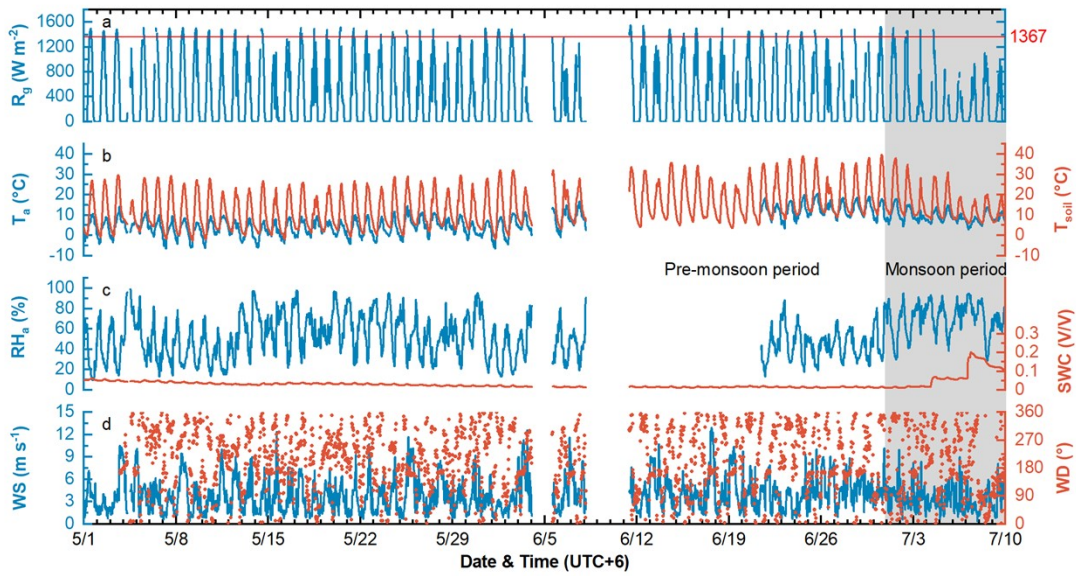

**Figure S2.** Time series of meteorological parameters and soil characterization parameters associated with ozone deposition. (a) solar radiation ( $R_g$ ), (b) air temperature at 1.8 m ( $T_a$ ) and soil temperature at -5 cm ( $T_{soil}$ ), (c) air relative humidity at 1.8 m ( $RH_a$ ) and soil water content (SWC), (d) wind speed at 1.8 m ( $WS$ ) and wind direction ( $WD$ ).

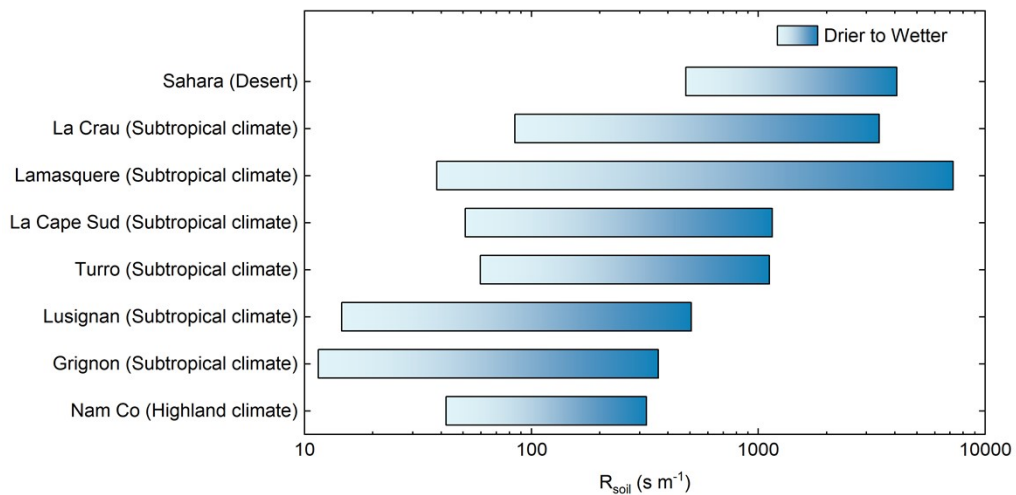

**Figure S3.** Comparison of soil resistance ( $R_{soil}$ ) at NMC site with  $R_{soil}$  over bare soil sites. Data from <sup>1-3</sup>.

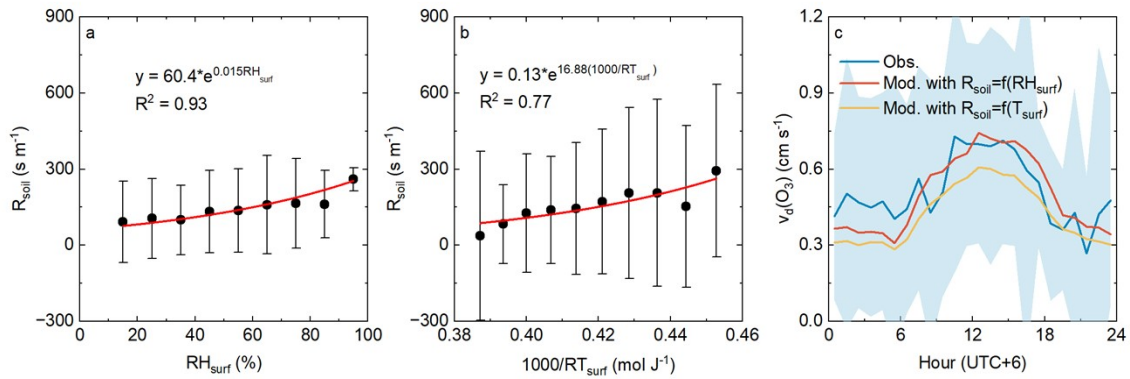

**Figure S4.**  $R_{soil}$  as a function of (a)  $RH_{surf}$  and (b)  $T_{surf}$ . Dots are block mean data with ranges of 10% for  $RH_{surf}$  and 5 °C for  $T_{surf}$ . (c) Comparison of observed  $v_d$ , simulated  $v_d$  using  $R_{soil}$  as a function of  $RH_{surf}$  and  $T_{surf}$  with input meteorological data from observation. Time alignments are performed to data used for comparison.

## References

- 1 H. Güsten, G. Heinrich, E. Mönnich, D. Sprung, J. Weppner, A. B. Ramadan, M. R. M. Ezz El-Din, D. M. Ahmed and G. K. Y. Hassan, *Atmospheric Environment*, 1996, **30**, 911–918.
- 2 P. Stella, B. Loubet, E. Lamaud, P. Laville and P. Cellier, *Agricultural and Forest Meteorology*, 2011, **151**, 669–681.
- 3 P. Stella, B. Loubet, C. de Berranger, X. Charrier, E. Ceschia, G. Gerosa, A. Finco, E. Lamaud, D. Serça, C. George and R. Ciuraru, *Atmospheric Environment*, 2019, **199**, 202–209.
